# Supplementary material
Source: PubMed Central journal article supplement (PMC2833265)
Supplement: NIHMS178454-supplement-Auxiliary_Figure_1.pdf [file NIHMS178454-supplement-Auxiliary_Figure_1.pdf]

# SCREEN MATCH TASK

Fixed Match

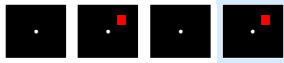

Retinal Match Behavioral Non-Match

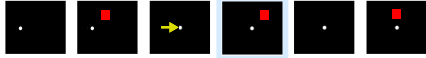

Screen Match Behavioral Match

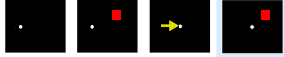

Fixed Non-Match

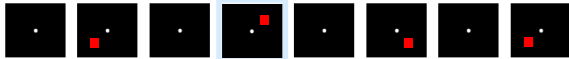

NonMatch with moving fixation

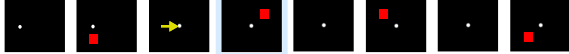

2nd stimulus in RF

Fixed Match

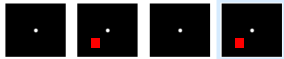

Retinal Match Behavioral Non-Match

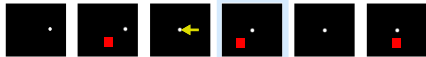

Screen Match Behavioral Match

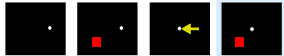

Fixed Non-Match

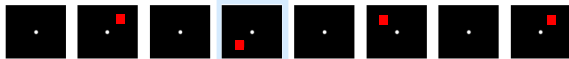

NonMatch with moving fixation

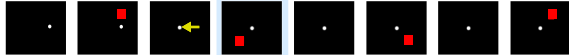

2nd stimulus out of RF

# RETINAL MATCH TASK

Fixed Match

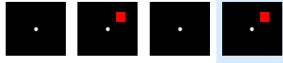

Retinal Match Behavioral Match

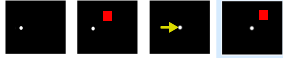

Screen Match Behavioral Non-Match

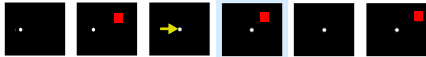

Fixed Non-Match

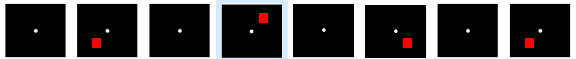

NonMatch with moving fixation

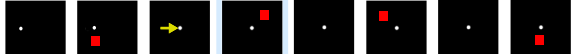

Fixed Match

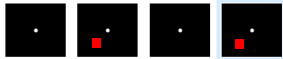

Retinal Match Behavioral Match

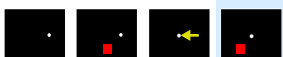

Screen Match Behavioral Non-Match

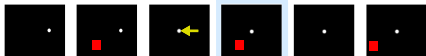

Fixed Non-Match

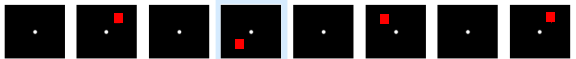

NonMatch with moving fixation

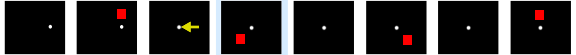

Auxiliary Figure 1. Example sets of trial blocks. Left panel: Schematic illustration of a full set of trials for the Screen Match task. Frames represent successive stimulus presentations. The second frame in the sequence involves presentation of the stimulus either in the upper left or the lower right location (inside a neuron's receptive field and its diametric location). All trial types were randomly interleaved during recordings. Right panel: Trial types in a block of trials of the Retinal Match Task.
